# Supplementary material for: A Multi-chain Surrogate-assisted Hybrid Optimization Framework for Joint Identification of Groundwater Contaminant Sources and Hydrogeological Parameters
Source: Copernicus journal article supplement (doi:10.5194/egusphere-2025-6140), 2025-12-18
Supplement: Supplementary file 1 [file egusphere-2025-6140-supplement.pdf]

**Table S1: Actual values of the source location and its release fluxes in Case1**

| Contaminant Source<br>( $SI, SJ$ ) | Release fluxes (kg/day) |          |          |          |          |
|------------------------------------|-------------------------|----------|----------|----------|----------|
|                                    | $S_1P_1$                | $S_1P_2$ | $S_1P_3$ | $S_1P_4$ | $S_1P_5$ |
| $S_1$<br>(5, 9)                    | 21.4                    | 52.2     | 13.5     | 40.7     | 22.9     |

**Table S2: Actual values of the source locations and their release fluxes in Case2**

| Source Location<br>( $SI, SJ$ ) | Release fluxes of stress periods (kg/day) |        |        |        |        |
|---------------------------------|-------------------------------------------|--------|--------|--------|--------|
|                                 | $SP_1$                                    | $SP_2$ | $SP_3$ | $SP_4$ | $SP_5$ |
| $S_1$<br>(4, 9)                 | 21.1                                      | 52.2   | 13.1   | 40.5   | 21.9   |
| $S_2$<br>(6, 6)                 | 14.3                                      | 5.1    | 29.6   | 14.2   | 39.7   |
| $S_3$<br>(5, 12)                | 32.2                                      | 25.2   | 6.8    | 18.7   | 23.2   |

**Table S3: Actual values of the source locations and their release fluxes in Case3**

| Source Location<br>( $SI, SJ$ ) | Release fluxes of stress periods (kg/day) |        |        |        |        |
|---------------------------------|-------------------------------------------|--------|--------|--------|--------|
|                                 | $SP_1$                                    | $SP_2$ | $SP_3$ | $SP_4$ | $SP_5$ |
| $S_1$<br>(17, 48)               | 72.2                                      | 45.1   | 31.7   | 20.4   | 15.7   |
| $S_2$<br>(19, 50)               | 21.3                                      | 64.9   | 43.2   | 35.2   | 27.6   |
| $S_3$<br>(24, 56)               | 13.7                                      | 16.9   | 60.5   | 35.7   | 31.8   |

**Table S4: Comparison of identified values under different noise levels for Case 1.** The values in parentheses denote the relative error (%).

| Parameters | Actual value | Identified values under varying noise levels |             |              |             |
|------------|--------------|----------------------------------------------|-------------|--------------|-------------|
|            |              | 0%                                           | 0.5%        | 1%           | 2%          |
| $H_1$      | 42.7         | 42.3 (0.9%)                                  | 42.9 (0.5%) | 43.1 (1.0%)  | 41.9 (1.9%) |
| $H_2$      | 35.3         | 35.1 (0.5%)                                  | 35.5 (0.6%) | 35.7 (1.1%)  | 34.6 (2.0%) |
| $K$        | 18.1         | 18.3 (1.1%)                                  | 18.5 (2.2%) | 18.7 (3.3%)  | 18.4 (1.6%) |
| $SI_1$     | 5            | 5 (0%)                                       | 5 (0%)      | 5 (0%)       | 5 (0%)      |
| $SJ_1$     | 9            | 9 (0%)                                       | 9 (0%)      | 9 (0%)       | 9 (0%)      |
| $S_1P_1$   | 21.4         | 20.7 (3.3%)                                  | 21.7 (1.4%) | 22.9 (7.0%)  | 20.3 (5.1%) |
| $S_1P_2$   | 52.2         | 51.7 (1.0%)                                  | 52.9 (1.3%) | 52.5 (0.6%)  | 54.7 (4.8%) |
| $S_1P_3$   | 13.5         | 13.1 (3.0%)                                  | 12.4 (8.1%) | 11.6 (14.1%) | 12.1 (10.4) |
| $S_1P_4$   | 40.7         | 41.6 (2.2%)                                  | 41.6 (2.2%) | 40.4 (0.7%)  | 41.7 (2.5%) |
| $S_1P_5$   | 22.9         | 23.8 (3.9%)                                  | 21.2 (7.4%) | 23.4 (2.2%)  | 22.3 (2.6%) |

**Table S5: Comparison of identified values under different noise levels for Case 2.** The values in parentheses denote the relative error (%).

| Parameters | Actual value | Identified values under varying noise levels |              |              |              |
|------------|--------------|----------------------------------------------|--------------|--------------|--------------|
|            |              | 0%                                           | 0.5%         | 1%           | 2%           |
| $H_1$      | 42.7         | 42.3 (1.2%)                                  | 43.4 (1.6%)  | 43.1 (0.7%)  | 41.9 (3.3%)  |
| $H_2$      | 35.3         | 35.1 (0.8%)                                  | 34.2 (3.1%)  | 35.7 (1.7%)  | 34.6 (1.7%)  |
| $K$        | 18.1         | 18.3 (1.1%)                                  | 18.5 (2.2%)  | 22.7 (1.7%)  | 23.4 (0.6%)  |
| $SI_1$     | 4            | 4 (0.0%)                                     | 4 (0.0%)     | 4 (0.0%)     | 4 (0.0%)     |
| $SJ_1$     | 9            | 9 (0.0%)                                     | 9 (0.0%)     | 9 (0.0%)     | 9 (0.0%)     |
| $S_1P_1$   | 21.1         | 20.7 (1.90%)                                 | 21.5 (1.9%)  | 22.0 (4.3%)  | 20.2 (4.3%)  |
| $S_1P_2$   | 52.2         | 50.2 (3.83%)                                 | 55.1 (5.6%)  | 53.9 (3.3%)  | 50.1 (4.0%)  |
| $S_1P_3$   | 13.1         | 12.6 (3.81%)                                 | 13.7 (4.6%)  | 12.3 (6.1%)  | 13.6 (3.8%)  |
| $S_1P_4$   | 40.5         | 38.8 (4.20%)                                 | 42.9 (5.9%)  | 38.4 (5.2%)  | 38.5 (4.9%)  |
| $S_1P_5$   | 21.9         | 20.8 (5.0%)                                  | 23.8 (8.7%)  | 22.5 (2.7%)  | 20.4 (6.9%)  |
| $SI_2$     | 6            | 6 (0.0%)                                     | 6 (0.0%)     | 6 (0.0%)     | 6 (0.0%)     |
| $SJ_2$     | 6            | 6 (0.0%)                                     | 6 (0.0%)     | 6 (0.0%)     | 6 (0.0%)     |
| $S_2P_1$   | 14.3         | 13.8 (3.49%)                                 | 14.9 (4.2%)  | 14.9 (4.2%)  | 13.6 (4.9%)  |
| $S_2P_2$   | 5.1          | 4.5 (11.76%)                                 | 5.8 (13.7%)  | 5.8 (13.7%)  | 5.7 (11.8%)  |
| $S_2P_3$   | 29.6         | 29.0 (2.0%)                                  | 28.6 (3.4%)  | 30.5 (3.0%)  | 30.5 (3.0%)  |
| $S_2P_4$   | 14.2         | 12.7 (10.6%)                                 | 12.5 (12.0%) | 16.1 (13.4%) | 15.7 (10.6%) |
| $S_2P_5$   | 39.7         | 38.5 (3.0%)                                  | 40.5 (2.0%)  | 41.7 (5.0%)  | 38.4 (3.3%)  |
| $SI_3$     | 5            | 5 (0.0%)                                     | 5 (0.0%)     | 5 (0.0%)     | 5 (0.0%)     |
| $SJ_3$     | 12           | 12 (0.0%)                                    | 12 (0.0%)    | 12 (0.0%)    | 12 (0.0%)    |
| $S_3P_1$   | 32.2         | 30.2 (6.2%)                                  | 34.6 (7.5%)  | 29.8 (7.5%)  | 35.1 (9.0%)  |
| $S_3P_2$   | 25.2         | 24 (4.8%)                                    | 24.5 (2.8%)  | 22.8 (9.5%)  | 25.8 (2.4%)  |
| $S_3P_3$   | 6.8          | 5.8 (14.7%)                                  | 7.3 (7.4%)   | 6.4 (5.9%)   | 6.2 (8.8%)   |
| $S_3P_4$   | 18.7         | 16.9 (9.6%)                                  | 17.1 (8.6%)  | 16.9 (9.6%)  | 22.1 (18.2%) |
| $S_3P_5$   | 23.2         | 22.8 (1.7%)                                  | 22.4 (3.5%)  | 24.1 (3.9%)  | 24.5 (5.6)   |

**Table S6: Comparison of identified values under different noise levels for Case 3.** The values in parentheses denote the relative error (%).

| Parameters | Actual value | Identified values under varying noise levels |              |              |              |
|------------|--------------|----------------------------------------------|--------------|--------------|--------------|
|            |              | 0%                                           | 0.5%         | 1%           | 2%           |
| $K_1$      | 22.9         | 22.5 (1.7%)                                  | 22.3 (2.6%)  | 23.4 (2.2%)  | 22.5 (1.7%)  |
| $K_2$      | 16.8         | 17.6 (4.7%)                                  | 16.5 (1.8%)  | 15.7 (6.5%)  | 17.8 (5.9%)  |
| $K_3$      | 22.2         | 23.0 (3.6%)                                  | 24.2 (9.0%)  | 20.1 (9.4%)  | 23.2 (4.5%)  |
| $K_4$      | 17.8         | 18.5 (3.9%)                                  | 16.9 (5.1%)  | 18.2 (2.2%)  | 17.5 (1.7%)  |
| $SI_1$     | 17           | 17 (0.0%)                                    | 17 (0.0%)    | 17 (0.0%)    | 17 (0.0%)    |
| $SJ_1$     | 46           | 46 (0.0%)                                    | 46 (0.0%)    | 46 (0.0%)    | 46 (0.0%)    |
| $S_1P_1$   | 72.2         | 70.4 (2.5%)                                  | 73.8 (2.2%)  | 69.9 (3.2%)  | 74.2 (2.8%)  |
| $S_1P_2$   | 45.1         | 44.1 (2.2%)                                  | 46.6 (3.3%)  | 47.1 (4.4%)  | 47.9 (6.2%)  |
| $S_1P_3$   | 31.7         | 29.4 (7.3%)                                  | 28.9 (8.8%)  | 34.1 (7.6%)  | 33.8 (6.6%)  |
| $S_1P_4$   | 20.4         | 18.8 (7.8%)                                  | 22.1 (8.3%)  | 22.4 (9.8%)  | 17.8 (12.7%) |
| $S_1P_5$   | 15.7         | 14.0 (10.8%)                                 | 17.6 (12.1%) | 13.8 (12.1%) | 17.3 (10.2%) |
| $SI_2$     | 19           | 19 (0.0%)                                    | 19 (0.0%)    | 19 (0.0%)    | 19 (0.0%)    |
| $SJ_2$     | 51           | 51 (0.0%)                                    | 51 (0.0%)    | 51 (0.0%)    | 51 (0.0%)    |
| $S_2P_1$   | 21.3         | 19.4 (8.9%)                                  | 18.9 (11.3%) | 22.7 (6.6%)  | 23.6 (10.8%) |
| $S_2P_2$   | 64.9         | 61.4 (5.4%)                                  | 67.9 (4.6%)  | 67.9 (4.6%)  | 62.7 (3.4%)  |
| $S_2P_3$   | 43.2         | 40.2 (6.9%)                                  | 41.1 (4.8%)  | 46.2 (6.9%)  | 46.8 (8.3%)  |
| $S_2P_4$   | 35.2         | 33.4 (5.1%)                                  | 36.9 (4.8%)  | 33.2 (5.7%)  | 33.6 (4.5%)  |
| $S_2P_5$   | 27.6         | 25.6 (7.2%)                                  | 25.3 (8.3%)  | 29.6 (7.2%)  | 25.9 (6.2%)  |
| $SI_3$     | 24           | 24 (0.0%)                                    | 24 (0.0%)    | 24 (0.0%)    | 24 (0.0%)    |
| $SJ_3$     | 57           | 57 (0.0%)                                    | 57 (0.0%)    | 57 (0.0%)    | 57 (0.0%)    |
| $S_3P_1$   | 13.7         | 12.4 (9.5%)                                  | 12.5 (8.8%)  | 14.8 (8.0%)  | 12.1 (11.7%) |
| $S_3P_2$   | 16.9         | 16.0 (5.3)                                   | 15.8 (6.5%)  | 18.2 (7.7%)  | 15.4 (8.9%)  |
| $S_3P_3$   | 60.5         | 63.2 (4.5%)                                  | 57.8 (4.5%)  | 63.2 (4.5%)  | 57.8 (4.5%)  |
| $S_3P_4$   | 35.7         | 35.2 (1.4%)                                  | 34.5 (3.4%)  | 33.9 (5.0%)  | 34.1 (4.1%)  |
| $S_3P_5$   | 31.8         | 31.6 (0.6%)                                  | 32.2 (1.3%)  | 30.9 (2.8%)  | 30.5 (4.6%)  |
